# Supplementary material for: One-dimensional infinite chain structures of [Al2(OH)4(H2O)4]X2 (X = I, Br, Cl): an aggregate of Al2 species and a precursor of Al(OH)3
Source: Royal Society of Chemistry journal article supplement (doi:10.1039/c3dt50811k), 2013-01-01
Supplement: c3dt50811k.pdf [file c3dt50811k.pdf]

## Supplementary Information

<http://www.rsc.org>

### Table of Contents

#### 1 The Structurally Known Polyaluminum Species and A Classification

Figure S1

#### 2 Characterization Results from Other Methods

##### 2.1 XRD Analysis

Figure S2

##### 2.2 Chemical Analysis

Table S1

##### 2.3 TG Analysis

Figure S3

#### 3 Rietveld Full-profile Fitting Results Based on Le Bail Fit

Figure S4

#### 4 Three-dimensional View of The Crystal Structure of $\text{Al}_2(\text{OH})_4(\text{H}_2\text{O})_4\text{I}_2$

Figure S5

#### 5 The Infinite Chain Structures of the Polycation $\text{Al}_2(\text{OH})_4(\text{H}_2\text{O})_4^{2+}$ in $\text{Al}_2(\text{OH})_4(\text{H}_2\text{O})_4\text{X}_2$

Figure S6

#### 6 The Crystal Structures and Intermolecular Interactions of $[\text{Al}_2(\text{OH})_4(\text{H}_2\text{O})_4]\text{X}_2$

Figure S7

#### 7 XRD Pattern of The Product Precipitated from The Treated Solution of $\text{Al}_2(\text{OH})_4(\text{H}_2\text{O})_4\text{I}_2$ at 75 °C

Figure S8

## Supplementary Information

### 1 The Structurally Known Polyaluminum Species and A Classification

The ten finite polyaluminum species shown in the top of Figure S1 fall into two groups: one is characterized by “core-shell” structure derived from the  $\epsilon$ -Keggin structure, in which a core of  $\text{AlO}_4$  tetrahedron is surrounded by a shell of twelve  $\text{AlO}_6$  octahedra linked by vertex- and edge-sharing such as  $\epsilon\text{-K-Al}_{13}$  (crystallized as  $\text{Na}[\text{Al}_{13}\text{O}_4(\text{OH})_{24}(\text{H}_2\text{O})_{12}][\text{SO}_4]_4 \cdot 10\text{H}_2\text{O}$ ,  $\text{Na}[\text{Al}_{13}\text{O}_4(\text{OH})_{24}(\text{H}_2\text{O})_{12}][\text{SeO}_4]_4 \cdot 10\text{H}_2\text{O}$  and  $[\text{Al}_{13}\text{O}_4(\text{OH})_{25}(\text{H}_2\text{O})_{11}][\text{SO}_4]_3 \cdot 16\text{H}_2\text{O}$  by Johansson *et al.*),<sup>34-37</sup>  $\text{S-K-Al}_{13}$  (crystallized as  $[\text{Al}_{13}\text{O}_4(\text{OH})_{25}(\text{H}_2\text{O})_{10}(\text{SO}_4)][\text{SO}_4]_2 \cdot 5\text{H}_2\text{O}$  by Sun *et al.*),<sup>48</sup> a structure similar to the  $\epsilon\text{-K-Al}_{13}$  but the units are linked by two  $(\text{SO}_4^{2-})_{0.5}$  with replacement of a  $\text{H}_3\text{O}^+$  ion,  $\text{Na-}\delta\text{-Al}_{13}$  (crystallized as  $\text{Na-}\delta\text{-Al}_{13}[\text{Al}_{13}\text{O}_4(\text{OH})_{24}(\text{H}_2\text{O})_{15}][\text{SO}_4]_4 \cdot 16\text{H}_2\text{O}$  by Rowsell and Nazar),<sup>49</sup> a derivative of  $\epsilon\text{-K-Al}_{13}$  in which one of the triads ( $\text{Al}_3\text{O}_{13}$ ) units which consists of three vertex- and edge-shared  $\text{AlO}_6$  octahedra is rotated  $60^\circ$  with respect to the remainder of the  $\epsilon\text{-K-Al}_{13}$  cluster to form six shared vertexes instead of three edges, and a  $\text{NaO}_6$  octahedron caps on the rotated  $\text{Al}_3\text{O}_{13}$  unit,  $\text{Al}_{30}$  (crystallized as  $[\text{Al}_{30}\text{O}_8(\text{OH})_{56}(\text{H}_2\text{O})_{26}][\text{SO}_4]_9 \cdot x\text{H}_2\text{O}$  by Rowsell and Nazar, and Allouche *et al.*),<sup>49, 50</sup> an aggregation of two octahedral  $\text{AlO}_6$  monomer capped  $\delta\text{-Al}_{13}$  linked by additional two octahedral  $\text{AlO}_6$  monomers via sharing four of its vertexes, in which each monomer capped  $\delta\text{-Al}_{13}$  is formed by capping an  $\text{AlO}_6$  octahedral monomer on the rotated triad unit of a  $\delta\text{-Al}_{13}$  by sharing three of its edges, and  $\text{S-Al}_{32}$  (crystallized as  $[\text{Al}_{32}\text{O}_8(\text{OH})_{60}(\text{H}_2\text{O})_{28}(\text{SO}_4)_2][\text{SO}_4]_7[\text{Cl}]_2 \cdot 30\text{H}_2\text{O}$  by Sun *et al.*),<sup>48</sup> a structure similar to that of  $\text{Al}_{30}$  but the units are linked by two  $[\text{Al}(\text{OH})_2(\text{H}_2\text{O})_3(\text{SO}_4)]^-$  groups with replacement of four  $\eta^1\text{-H}_2\text{O}$  molecules; another is characterized by “plank-suspending” structure in which some  $\text{AlO}_6$  octahedra are connected to each other in a vertex- and edge-sharing manner to form a “plank” with some additional  $\text{AlO}_6$  octahedral monomers “suspended” on the periphery by vertex-sharing, such as  $\text{P-Al}_{13}$  (crystallized as  $[\text{Al}_{13}(\text{OH})_{24}(\text{H}_2\text{O})_{24}][\text{Cl}]_{15} \cdot 13\text{H}_2\text{O}$  by Seichter *et al.* and Sun *et al.*, as  $[\text{Al}_{13}(\text{OH})_{24}(\text{H}_2\text{O})_{24}][\text{NO}_3]_{15} \cdot 9\text{H}_2\text{O}$  by Gatlin *et al.* and Wang *et al.*)<sup>51-54</sup> that has a plank formed by seven  $\text{AlO}_6$  octahedra with six additional  $\text{AlO}_6$  octahedral monomers suspended on its periphery,  $\text{Al}_8$  (crystallized as  $[\text{Al}_8(\text{OH})_{14}(\text{H}_2\text{O})_{18}][\text{SO}_4]_5 \cdot 16\text{H}_2\text{O}$  by Casey *et al.*)<sup>55</sup> that has a plank formed by four  $\text{AlO}_6$  octahedra with four additional  $\text{AlO}_6$  octahedra suspended on it,  $\text{Al}_2$  (crystallized as  $[\text{Al}_2(\text{OH})_2(\text{H}_2\text{O})_8][\text{SO}_4]_2 \cdot 2\text{H}_2\text{O}$  and  $[\text{Al}_2(\text{OH})_2(\text{H}_2\text{O})_8][\text{SeO}_4]_2 \cdot 2\text{H}_2\text{O}$  by Johansson)<sup>56</sup> which can be regarded as a no suspending case of the “plank-suspending” structure with a plank formed by two  $\text{AlO}_6$

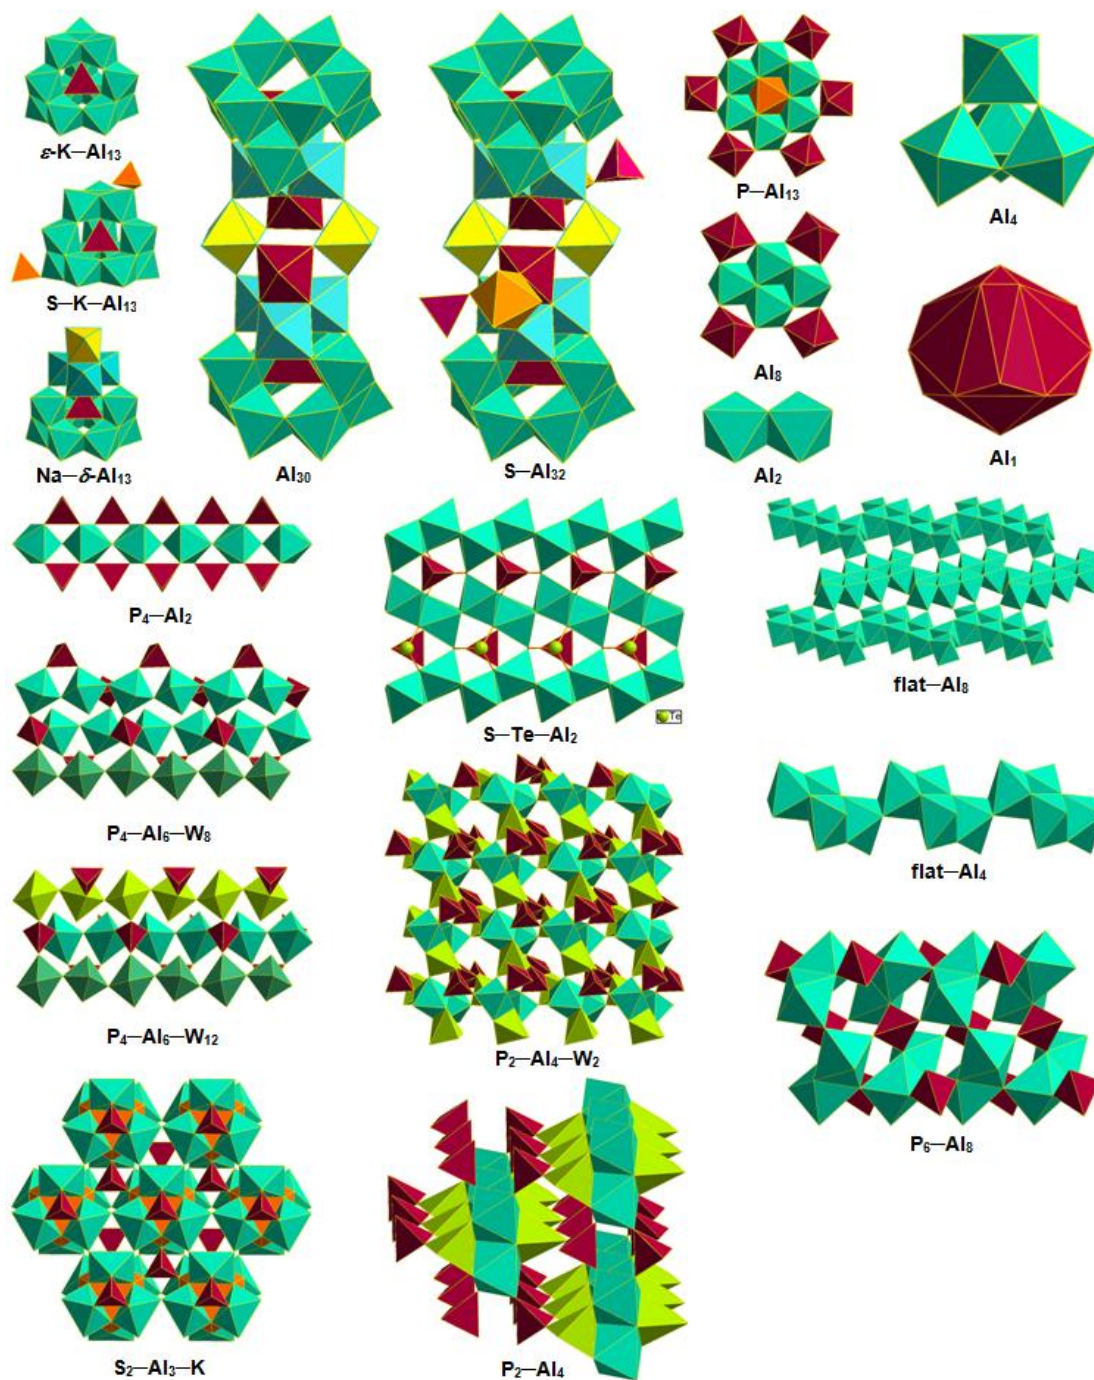

**Figure S1. Finite and infinite structures of aluminum species verified by crystal structure analysis**

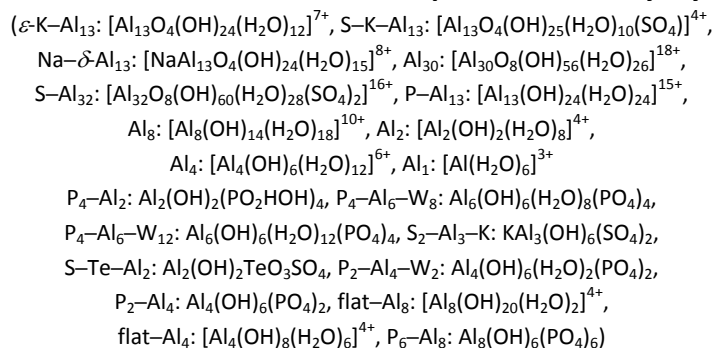

octahedra only,  $\text{Al}_4$  &  $\text{Al}_1$  (crystallized as  $[\text{Al}_4(\text{OH})_6(\text{H}_2\text{O})_{12}][\text{Al}(\text{H}_2\text{O})_6]_2\text{Br}_{12}$  by Sun *et al.*),<sup>57</sup> the former can be regarded as a no plank case of the “plank-suspending” structure, it is composed of four  $\text{AlO}_6$  octahedra that are suspended to each other by sharing three vertexes of each octahedron and form a large regular tetrahedron with ideal  $T_d$  symmetry, the central  $\text{Al}^{3+}$  ion of the latter is coordinated by 6 disordered  $\text{H}_2\text{O}$  molecules, that form a core-shell structure with ideal  $D_{3d}$  symmetry and coexist in a 2:1 ratio with the former.

The ten infinite polyaluminum species shown in the bottom of Figure S1 fall into three groups: the first group is characterized by vertex-sharing either between  $\text{AlO}_6$  octahedra or between  $\text{AlO}_6$  octahedra and counterions (tetrahedral  $\text{PO}_2\text{HOH}$ ,  $\text{PO}_4$ , or  $\text{SO}_4$  ligands), such as  $\text{P}_4\text{--Al}_2$  (crystallized as  $\text{Al}_2(\text{OH})_2(\text{PO}_2\text{HOH})_4 \cdot 6\text{H}_2\text{O}$  by Li and Xiang),<sup>58</sup> an one-dimensional infinite chain composed of OH-shared  $\text{Al}(\text{OH})_2\text{O}_4$  octahedra and  $\mu_2\text{--PO}_2\text{HOH}$  tetrahedra that locked the intrachain adjacent  $\text{Al}(\text{OH})_2\text{O}_4$  octahedra by O-sharing,  $\text{P}_4\text{--Al}_6\text{--W}_8$  (a natural wavellite mineral crystallized as  $\text{Al}_6(\text{OH})_6(\text{H}_2\text{O})_8(\text{PO}_4)_4 \cdot 2\text{H}_2\text{O}$  found from USA, its structure was solved by Araki and Zoltai),<sup>59</sup> an incompact three-dimensional infinite structure composed of two types of one-dimensional infinite chains presented in a 1:2 ratio and respectively composed of OH-shared  $\text{Al}(\text{OH})_2\text{O}_2(\text{H}_2\text{O})_2$  and  $\text{Al}(\text{OH})_2\text{O}_3(\text{H}_2\text{O})$  octahedra, and  $\mu_4\text{--PO}_4$  tetrahedra that fixed the interspaces between chains by O-sharing,  $\text{P}_4\text{--Al}_6\text{--W}_{12}$  (a similar natural wavellite mineral crystallized as  $\text{Al}_6(\text{OH})_6(\text{H}_2\text{O})_{12}(\text{PO}_4)_4$  found from China, its structure was solved by Fu),<sup>60</sup> also an incompact three-dimensional infinite structure but composed of three types of one-dimensional infinite chains that are respectively composed of OH-shared  $\text{Al}(\text{OH})_2\text{O}(\text{H}_2\text{O})_3$ ,  $\text{Al}(\text{OH})_2\text{O}_2(\text{H}_2\text{O})_2$ , and  $\text{Al}(\text{OH})_2\text{O}_3(\text{H}_2\text{O})$  octahedra,  $\mu_4\text{--PO}_4$  and  $\mu_2\text{--PO}_4$  tetrahedra that fixed the interspaces between chains by O-sharing,  $\text{S}_2\text{--Al}_3\text{--K}$  (a natural alunite mineral crystallized as  $\text{KAl}_3(\text{OH})_6(\text{SO}_4)_2$  found from USA and Italy, the structure was respectively solved by Hendricks,<sup>61</sup> Wang *et al.*,<sup>62</sup> and Menchetti and Sabelli,<sup>63</sup> and a XRD pattern was calculated from Hendricks’ parameters by Pabst<sup>64</sup>), a two-dimensional infinite hexameric ring layer composed of OH-shared  $\text{Al}(\text{OH})_4\text{O}_2$  octahedra and O-shared  $\mu_3\text{--SO}_4$  tetrahedra that coordinate to each  $\text{Al}_3$  island formed by three vertex-shared hexameric rings from its two sides, with the  $\text{K}^+$  ions locked the interlayer space by forming  $\text{KO}_{12}$  icosahedra, also, the  $\text{K}^+$  position can be replaced by  $\text{Na}^+$  or others whole or in part (such as the natroalunite mineral crystallized as  $\text{NaAl}_3(\text{OH})_6(\text{SO}_4)_2$  found from China, the structure was solved from its powder XRD data by Tang *et al.*;<sup>65</sup> another natroalunite mineral crystallized as  $\text{Na}_{0.58}\text{K}_{0.42}\text{Al}_3(\text{OH})_6(\text{SO}_4)_2$  found from Japan, the structure was solved by Okada *et al.*;<sup>66</sup> and the minamiite and ammonioalunite minerals whose structures were solved by Ossaka *et al.*<sup>67</sup> and

Altaner et al.<sup>68</sup>); the second group is characterized by edge- and vertex-sharing or edge-sharing only, such as S–Te–Al<sub>2</sub> (crystallized as Al<sub>2</sub>(OH)<sub>2</sub>TeO<sub>3</sub>SO<sub>4</sub> by Johansson and Lindqvist),<sup>69</sup> a two-dimensional infinite sheet formed by splicing one-dimensional infinite zigzag chains together and locked by  $\mu_3$ -TeO<sub>3</sub> pyramids and  $\mu_2$ -SO<sub>4</sub> tetrahedra via O-sharing, while each chain is composed of edge-shared Al<sub>2</sub> units that connect together nose to tail by HO–OH edge-sharing, P<sub>2</sub>–Al<sub>4</sub>–W<sub>2</sub> (a natural senegalite mineral crystallized as Al<sub>4</sub>(OH)<sub>6</sub>(H<sub>2</sub>O)<sub>2</sub>(PO<sub>4</sub>)<sub>2</sub> found from Senegal, the structure was solved by Keegan et al.),<sup>70</sup> a crisscrossed three-dimensional infinite framework formed from orthogonal one-dimensional infinite chains and  $\mu_4$ -PO<sub>4</sub> tetrahedra that locked the intrachain and interchain spaces by O-sharing, while each chain is composed of (OH)<sub>2</sub>-edge-shared Al(OH)<sub>3</sub>O<sub>2</sub>(OH<sub>2</sub>) octahedron and Al(OH)<sub>3</sub>O<sub>2</sub> trigonal bipyramid units that link together nose to tail by OH-sharing, P<sub>2</sub>–Al<sub>4</sub> (a natural augelite mineral crystallized as Al<sub>4</sub>(OH)<sub>6</sub>(PO<sub>4</sub>)<sub>2</sub> found from USA, the structure was solved by Araki et al.),<sup>71</sup> a three-dimensional infinite framework formed from two-dimensional infinite layers that are composed of Al<sub>4</sub> units which are linked together by  $\mu_4$ -PO<sub>4</sub> tetrahedra (three of the four coordinated O atoms are used for each PO<sub>4</sub><sup>3-</sup> ion) via O-sharing, and the interspaces between layers are also locked by the  $\mu_4$ -PO<sub>4</sub> tetrahedra (the fourth coordinated O atom is used for each PO<sub>4</sub><sup>3-</sup> ion) via O-sharing, while each Al<sub>4</sub> unit are composed of two (OH)<sub>2</sub>-edge-shared Al(OH)<sub>4</sub>O<sub>2</sub> octahedra and two Al(OH)<sub>3</sub>O<sub>2</sub> trigonal bipyramids connected to its two sides by (OH)<sub>3</sub>-edges-sharing, also, the P position can be replaced by V (such as the compound crystallized as Al<sub>4</sub>(OH)<sub>6</sub>(VO<sub>4</sub>)<sub>2</sub>, a similar structure was solved from its powder XRD data by Pecquenard et al.),<sup>72</sup> flat–Al<sub>8</sub> (a natural felsobanyaite mineral crystallized as Al<sub>8</sub>(OH)<sub>20</sub>(H<sub>2</sub>O)<sub>2</sub>(SO<sub>4</sub>)<sub>2</sub>·6H<sub>2</sub>O found from Romania, the structure was solved by Farkas and Pertlik),<sup>73</sup> a three-dimensional infinite structure formed by splicing parallel (but with opposite orientation) infinite flat–Al<sub>8</sub> chains together by OH-sharing, while each infinite flat–Al<sub>8</sub> chain is composed of flat–Al<sub>8</sub> units that are linked together nose to tail by edge-sharing, and each flat–Al<sub>8</sub> unit are formed by splicing eight AlO<sub>6</sub> octahedra into two lines by edge-sharing, in which there is not any SO<sub>4</sub><sup>2-</sup> ion participating the coordination of the aluminum polycation, and flat–Al<sub>4</sub> (a natural aluminite mineral crystallized as Al<sub>4</sub>(OH)<sub>8</sub>(H<sub>2</sub>O)<sub>6</sub>(SO<sub>4</sub>)<sub>2</sub>·8H<sub>2</sub>O found from Hungary, the structure was solved by Sabelli and Ferroni),<sup>74</sup> in which four AlO<sub>6</sub> octahedra are connected each other by edges-sharing forming a flat–Al<sub>4</sub> unit, many flat–Al<sub>4</sub> units are linked together nose to tail by edge-sharing forming an infinite flat–Al<sub>4</sub> chain, again, there is not any SO<sub>4</sub><sup>2-</sup> ion participating the coordination of the aluminum polycation; the third group is characterized by face- and vertex-sharing, such as P<sub>6</sub>–Al<sub>8</sub> (a natural trolleite mineral crystallized as Al<sub>8</sub>(OH)<sub>6</sub>(PO<sub>4</sub>)<sub>6</sub> found from USA, the structure was solved by Moore

and Araki),<sup>75</sup> a very dense three-dimensional infinite structure composed of infinite double-chains that are formed by OH-bridging the Al dimers that are formed by connecting two  $\text{AlO}_6$  octahedra via face-sharing, and  $\mu_4\text{-PO}_4$  tetrahedra locked the intrachain and interchain spaces by O-sharing.

## 2 Characterization Results of Other Methods

### 2.1 XRD Analysis

The XRD patterns of the prepared polyaluminum iodide, bromide and chloride are shown in Figure S2, which were recorded on a Rigaku D/MAX 2500/PC X-ray diffractometer operating at  $\lambda=1.54178\text{\AA}$  (Cu  $K\alpha$ ), 40kV, 200mA for the former and 300mA for the latter two. The former can not match with any known compound within the latest PDF database and all the diffraction lines can be indexed, indicating that it is a new phase with high purity, its formula  $\text{Al}(\text{OH})_2\text{I}\cdot 2\text{H}_2\text{O}$  was measured by chemical analysis (see next section). The latter two can well match with the reported XRD lines (blue) of  $\text{Al}(\text{OH})_2\text{Br}\cdot 2\text{H}_2\text{O}$  on PDF27-005 and  $\text{Al}(\text{OH})_2\text{Cl}\cdot 2\text{H}_2\text{O}$  on PDF27-012, respectively, not only for their peak positions but also for their relative intensities, indicating that the purity of so prepared product  $\text{Al}(\text{OH})_2\text{Br}\cdot 2\text{H}_2\text{O}$  and  $\text{Al}(\text{OH})_2\text{Cl}\cdot 2\text{H}_2\text{O}$  are also high. Several unidentified weak peaks on higher  $2\theta$  region in Fig. S2 B and C are included in our indexing results, so they are not impurity peaks.

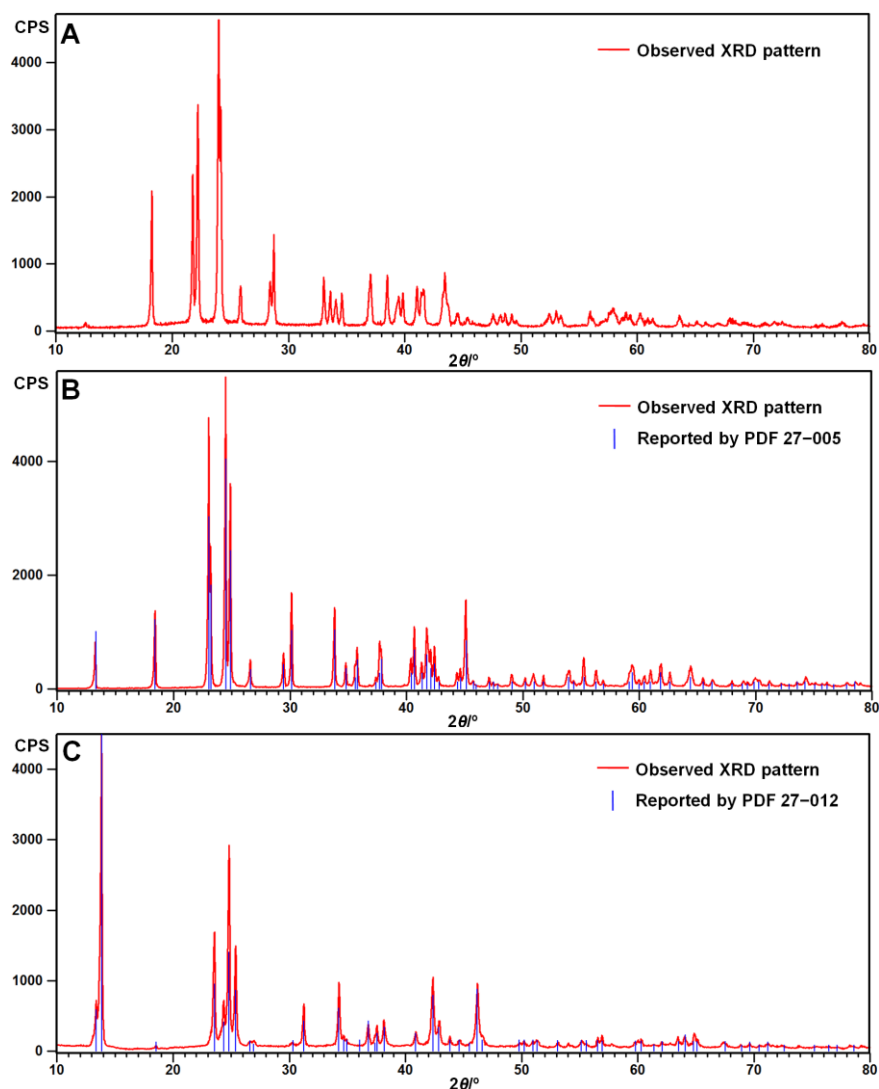

**Figure S2.** The XRD patterns of the prepared polyaluminum iodide (A), bromide (B) and chloride (C)

## 2.2 Chemical Analysis

The prepared polyaluminum iodide is watersoluble, so the dry sample was dissolved in deionized water directly and was depolymerized by adding concentrated  $\text{HNO}_3$  and boiling for 1 minute. The prepared polyaluminum bromide is waterinsoluble, the dry sample was dissolved in a  $\text{NaOH}$  solution (5mol/L) and kept boiling for 5 minutes, then the strongly alkaline solution was cooled down to room temperature and was adjusted to be highly acidic by adding a  $\text{HNO}_3$  solution (1:1 volume ratio) to depolymerize the polyaluminum compound. The amount of  $\text{Al}^{3+}$  ion was measured by the EDTA inverse titration method,  $\text{I}^-$  anion was measured by the oxidimetry,  $\text{Br}^-$  anion was measured by Fajans method,  $\text{OH}^-$  anion was calculated from the electric neutrality principle, and  $\text{H}_2\text{O}$  was calculated by

the weight subtraction method. The yield was calculated through dividing the obtained product weight by the expected product weight according to the reaction equation. The analysis results are listed in Table S1.

**Table S1. The chemical analysis results of the prepared polyaluminum compounds**

| sample<br>component            | polyaluminum iodide                     |                |                 |                  | polyaluminum bromide                     |                 |                 |                  |
|--------------------------------|-----------------------------------------|----------------|-----------------|------------------|------------------------------------------|-----------------|-----------------|------------------|
|                                | Al <sup>3+</sup>                        | I <sup>-</sup> | OH <sup>-</sup> | H <sub>2</sub> O | Al <sup>3+</sup>                         | Br <sup>-</sup> | OH <sup>-</sup> | H <sub>2</sub> O |
| calculated content*/%          | 12.05                                   | 56.67          | 15.19           | 16.09            | 15.25                                    | 45.16           | 19.22           | 20.36            |
| measured content/%             | 12.08                                   | 56.64          | 15.25           | 16.03            | 15.24                                    | 45.25           | 19.19           | 20.32            |
| content/mmol g <sup>-1</sup> ) | 4.477                                   | 4.463          | 8.967           | 8.896            | 5.648                                    | 5.663           | 11.28           | 11.28            |
| mole ratio                     | 1.000                                   | 0.997          | 2.003           | 1.987            | 1.000                                    | 1.003           | 1.997           | 1.997            |
| whole number ratio             | 1                                       | 1              | 2               | 2                | 1                                        | 1               | 2               | 2                |
| formula                        | Al(OH) <sub>2</sub> I·2H <sub>2</sub> O |                |                 |                  | Al(OH) <sub>2</sub> Br·2H <sub>2</sub> O |                 |                 |                  |
| yield/%                        | 76.3                                    |                |                 |                  | 71.9                                     |                 |                 |                  |

\*It means that the percentage compositions are calculated from the formulas Al(OH)<sub>2</sub>I·2H<sub>2</sub>O and Al(OH)<sub>2</sub>Br·2H<sub>2</sub>O, respectively.

From Table S1 it is obvious that the measured percentage compositions are very close to those calculated from their formulas and the mole ratios are very close to whole numbers, indicating that the formulas determined by chemical analysis are correct (the formula of the polyaluminum bromide is in accordance with that reported by PDF27-005) and the purities of so prepared compounds are high. These results are in good agreement with the results of XRD analysis.

### 2.3 Thermal Analysis

The TG curves of the prepared Al(OH)<sub>2</sub>I·2H<sub>2</sub>O and Al(OH)<sub>2</sub>Br·2H<sub>2</sub>O were recorded on a Netzsch STA 409PC thermal analyzer. The temperature was risen at a speed of 2.5 °C/min in the range of room temperature to 1200 °C with a N<sub>2</sub> velocity of flow of 20 mL/min. The results are shown in Figure S3. There are two mass loss steps on each TG curve, the total mass loss are 77.50% and 71.62% for the iodide and bromide, respectively, which are in good conformity with the calculated values of 77.23% and 71.19% from their formula, indicating that the purities of the prepared compounds are well and the formula measured by chemical analyses are correct. It is difficult to match each mass loss step

with an exact thermolysis reaction, because the final decomposition products are  $\text{Al}_2\text{O}_3$  for these two compounds and the escapes of HI, HBr, and  $\text{H}_2\text{O}$  gases are always accompanied in the whole thermolysis process. The overall thermolysis equation is:  $2\text{Al}(\text{OH})_2\text{X}\cdot 2\text{H}_2\text{O} \rightarrow \text{Al}_2\text{O}_3 + 2\text{HX}\uparrow + 3\text{H}_2\text{O}\uparrow$  ( $\text{X} = \text{I}, \text{Br}$ ).

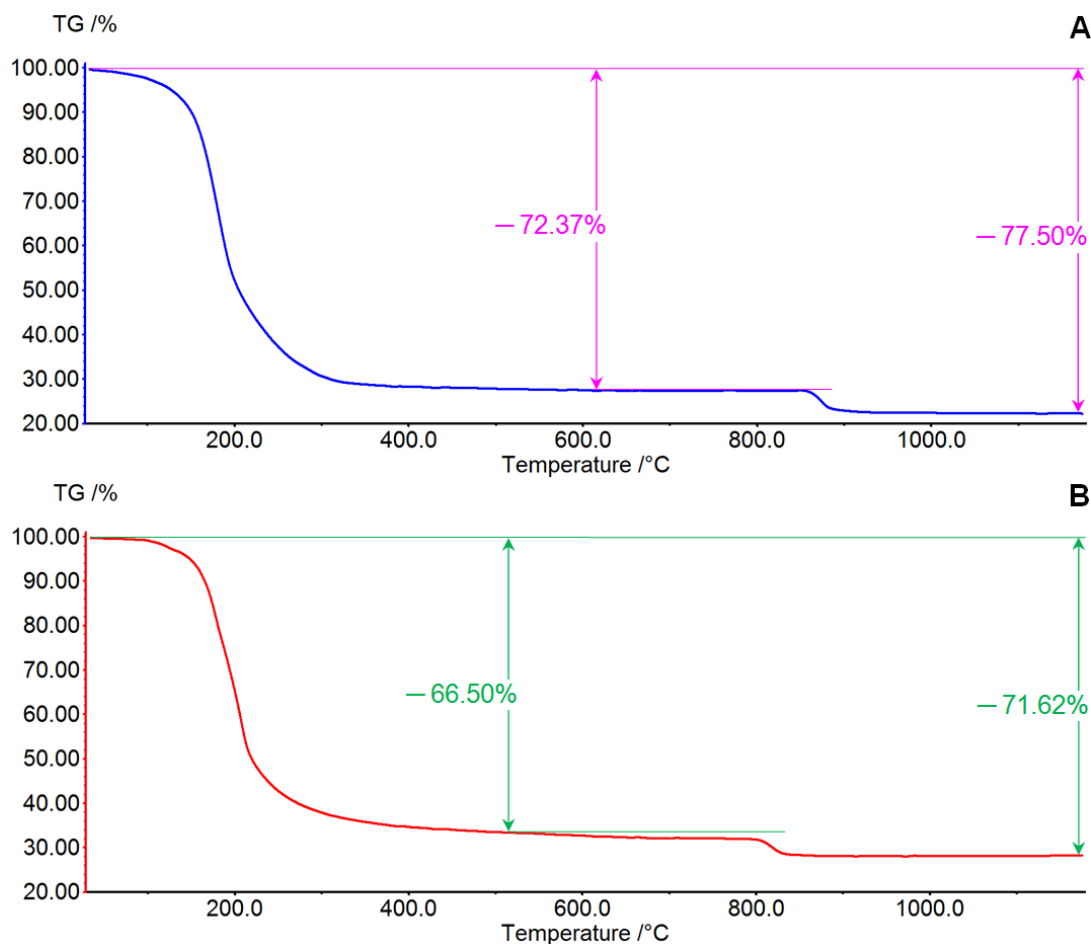

**Figure S3.** The TG curves of the prepared  $\text{Al}(\text{OH})_2\text{I}\cdot 2\text{H}_2\text{O}$  (A) and  $\text{Al}(\text{OH})_2\text{Br}\cdot 2\text{H}_2\text{O}$  (B)

### 3 Rietveld Full-profile Fitting Results Based on Le Bail Fit

It is obvious that the  $R$  indexes are low and the GOF values are very close to 1, indicating that the indexing results for these three compounds are reliable, and the  $HKL$  files generated by the program can be used for structure solving.

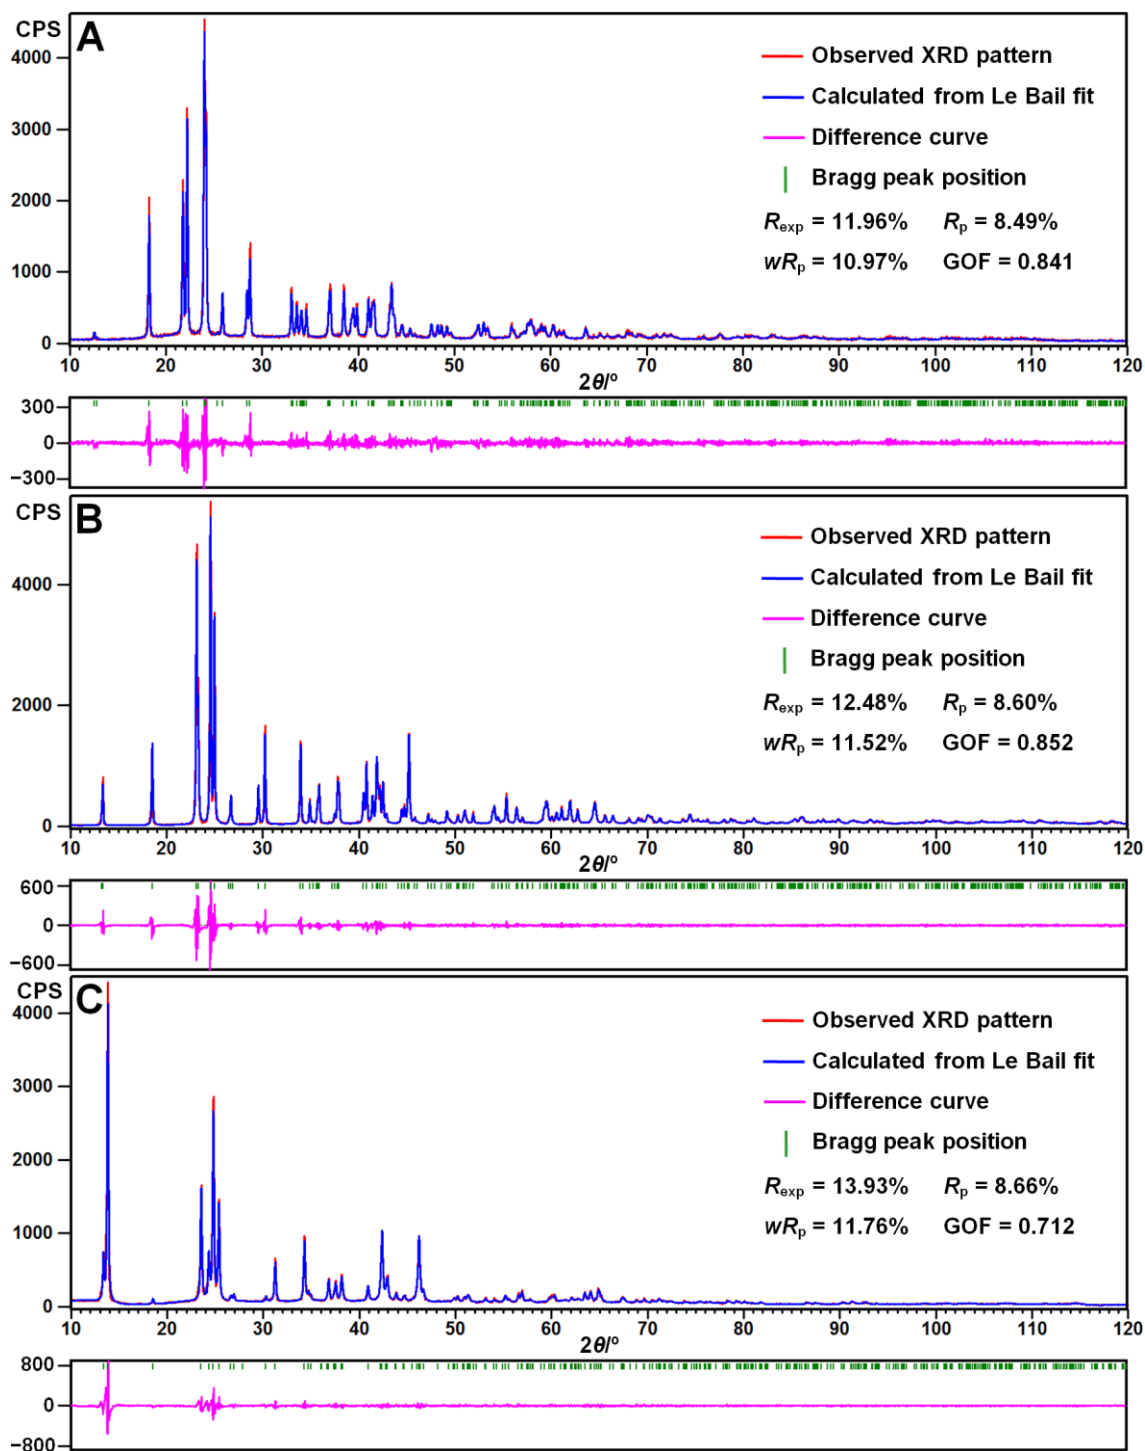

**Figure S4.** Rietveld full-profile fitting results based on Le Bail fit for the prepared  $\text{Al}(\text{OH})_2\text{I} \cdot 2\text{H}_2\text{O}$  (A),  $\text{Al}(\text{OH})_2\text{Br} \cdot 2\text{H}_2\text{O}$  (B), and  $\text{Al}(\text{OH})_2\text{Cl} \cdot 2\text{H}_2\text{O}$  (C)

#### 4 Three-dimensional View of The Crystal Structure of $\text{Al}_2(\text{OH})_4(\text{H}_2\text{O})_4\text{I}_2$

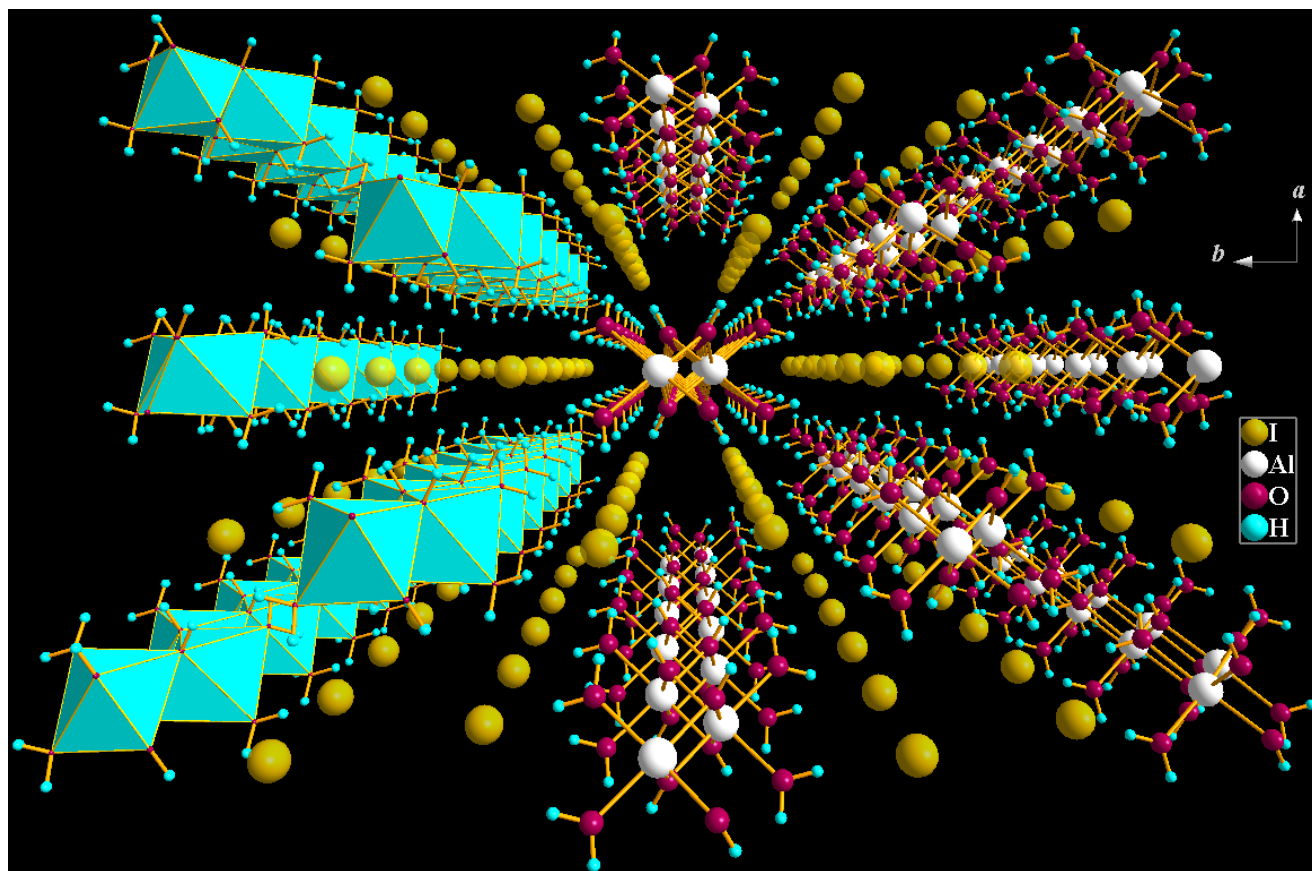

**Figure S5.** A three-dimensional view of the crystal structure of  $[\text{Al}_2(\text{OH})_4(\text{H}_2\text{O})_4]\text{I}_2$  along the  $c$  direction  
(Left: polyhedral representation; Right: ball and stick representation)

## 5 Infinite Chain Structures of the Polycation $[\text{Al}_2(\text{OH})_4(\text{H}_2\text{O})_4]^{2+}$ in $[\text{Al}_2(\text{OH})_4(\text{H}_2\text{O})_4]\text{X}_2$

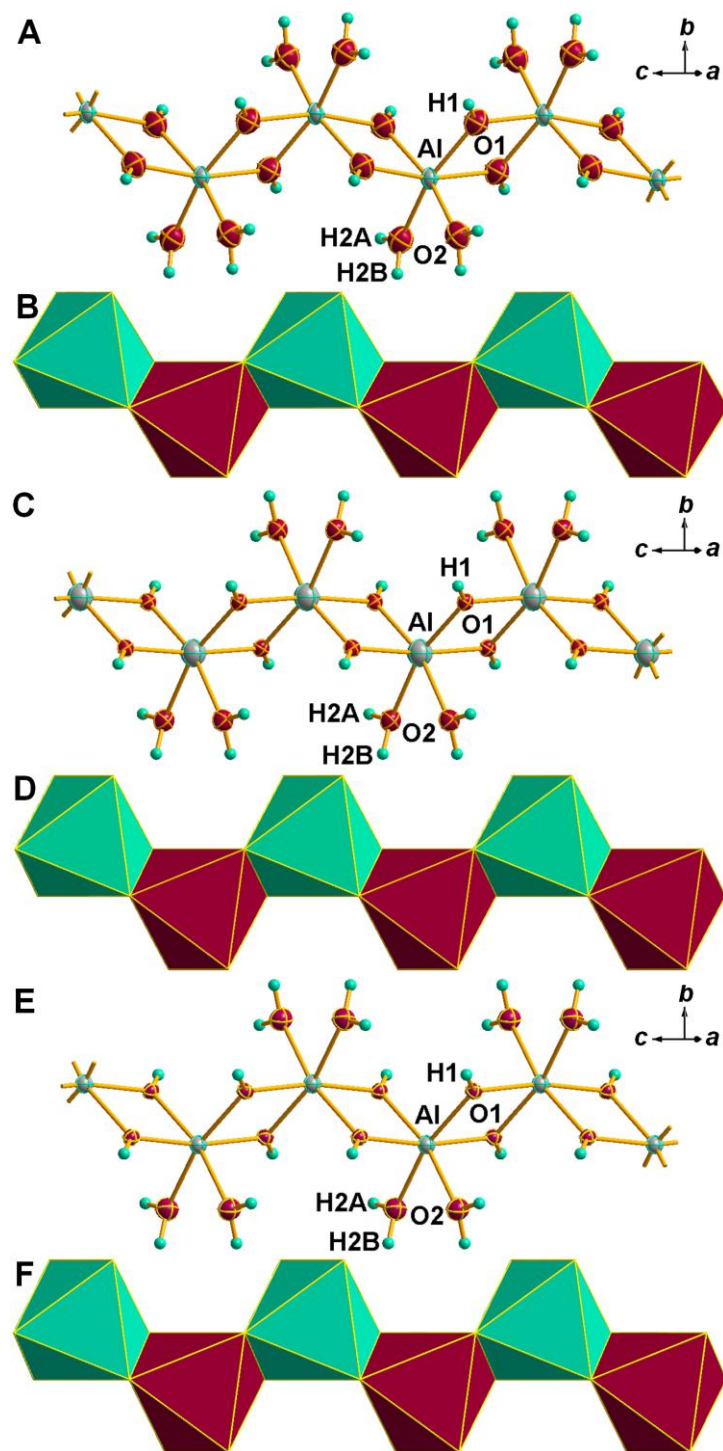

**Figure S6.** Infinite chain structures of the polycation  $[\text{Al}_2(\text{OH})_4(\text{H}_2\text{O})_4]^{2+}$  in  $[\text{Al}_2(\text{OH})_4(\text{H}_2\text{O})_4]\text{X}_2$  [ $\text{X} = \text{I}$  (A-B),  $\text{Br}$  (C-D), and  $\text{Cl}$  (E-F)]: (A), (C) and (E) ellipsoid-stick representations with a probability of 80%, (B), (D) and (F) polyhedral representations viewed along the (101) direction. The cyan and magenta octahedra represent two types of  $\text{AlO}_6$  octahedra with inverse orientations.

## 6 The Crystal Structures and Intermolecular Interactions of $[\text{Al}_2(\text{OH})_4(\text{H}_2\text{O})_4]\text{X}_2$

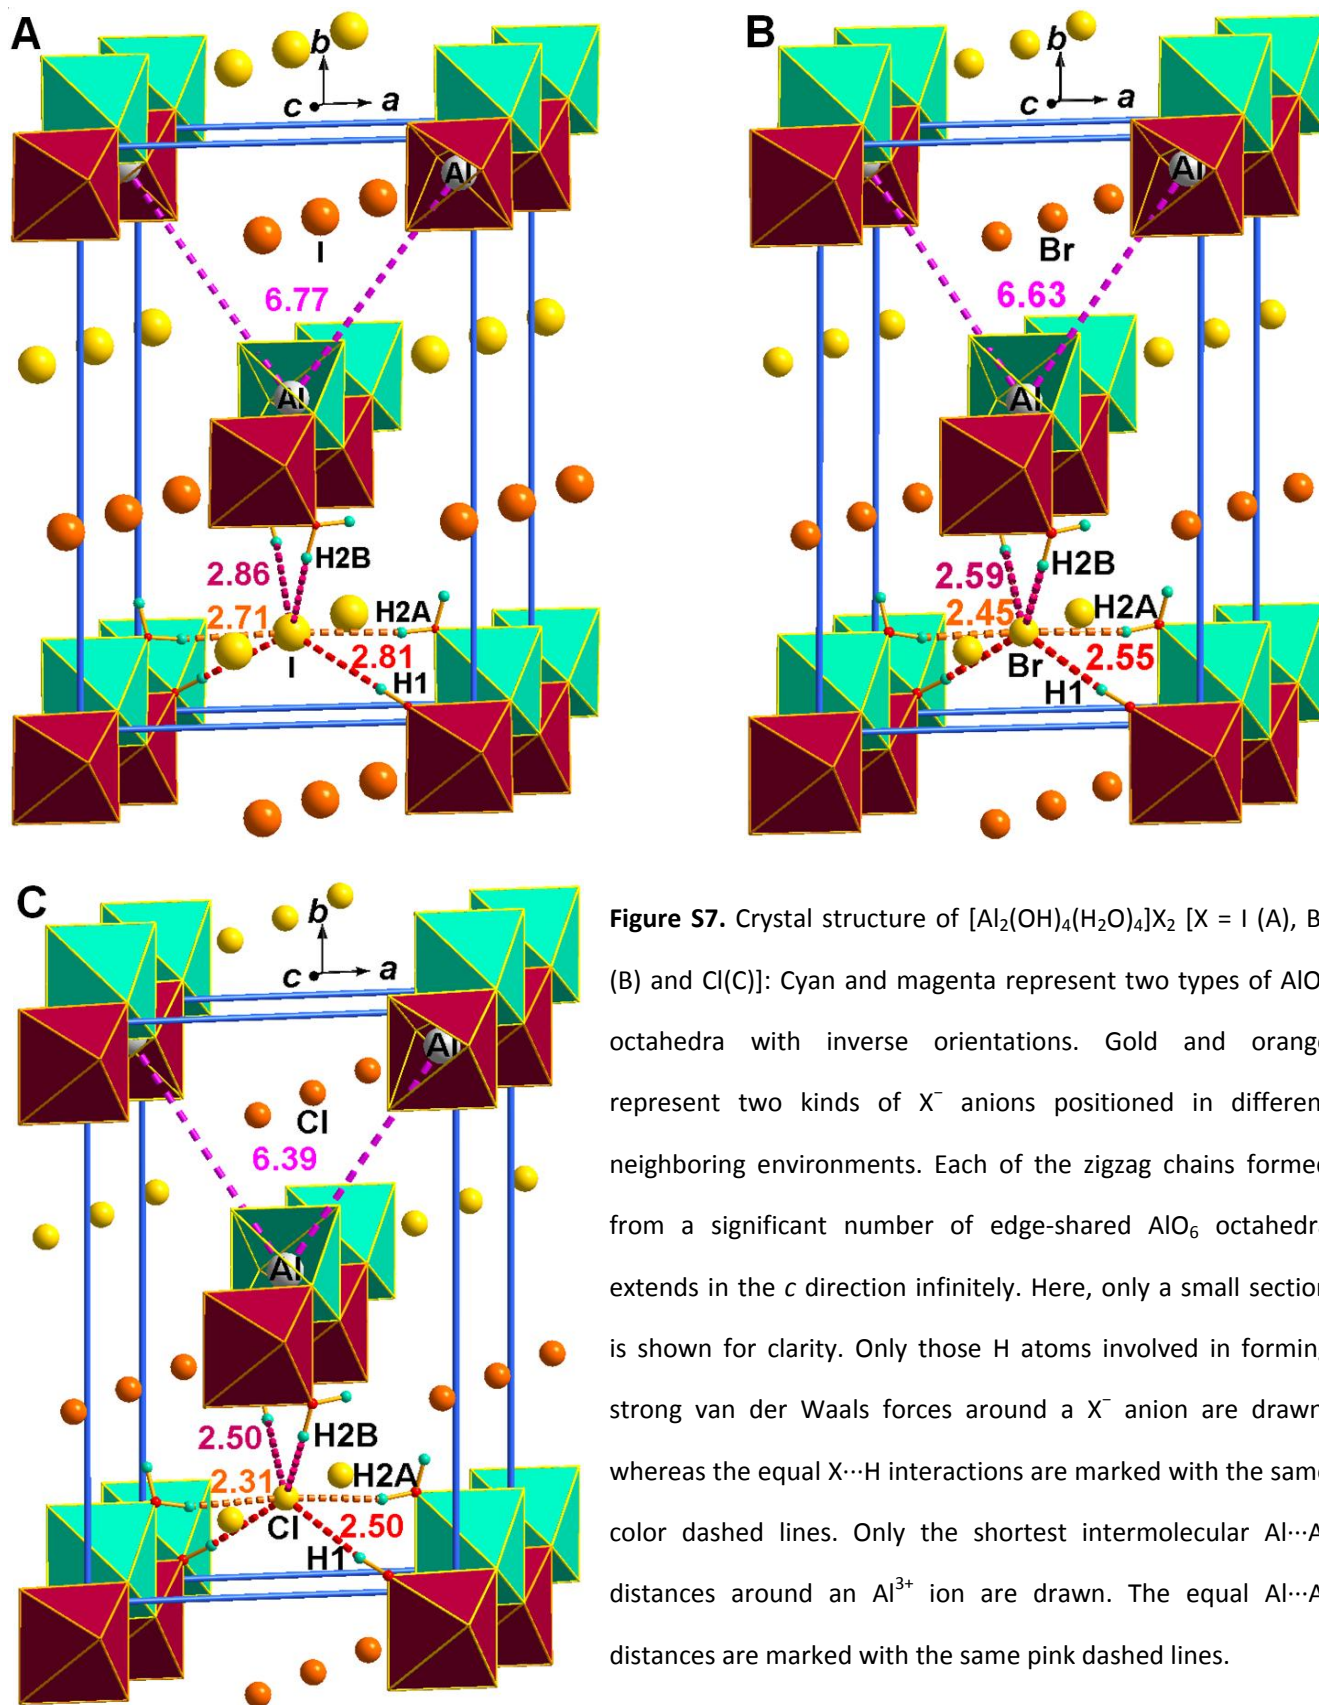

**Figure S7.** Crystal structure of  $[\text{Al}_2(\text{OH})_4(\text{H}_2\text{O})_4]\text{X}_2$  [ $\text{X} = \text{I}$  (A),  $\text{Br}$  (B) and  $\text{Cl}$ (C)]: Cyan and magenta represent two types of  $\text{AlO}_6$  octahedra with inverse orientations. Gold and orange represent two kinds of  $\text{X}^-$  anions positioned in different neighboring environments. Each of the zigzag chains formed from a significant number of edge-shared  $\text{AlO}_6$  octahedra extends in the  $c$  direction infinitely. Here, only a small section is shown for clarity. Only those H atoms involved in forming strong van der Waals forces around a  $\text{X}^-$  anion are drawn, whereas the equal  $\text{X}\cdots\text{H}$  interactions are marked with the same color dashed lines. Only the shortest intermolecular  $\text{Al}\cdots\text{Al}$  distances around an  $\text{Al}^{3+}$  ion are drawn. The equal  $\text{Al}\cdots\text{Al}$  distances are marked with the same pink dashed lines.

## 7 XRD Pattern of The Product Precipitated from Treated Solution of $\text{Al}_2(\text{OH})_4(\text{H}_2\text{O})_4\text{I}_2$ at $75^\circ\text{C}$

The XRD pattern of the product precipitated from the treated solution of  $\text{Al}_2(\text{OH})_4(\text{H}_2\text{O})_4\text{I}_2$  at  $75^\circ\text{C}$  in a steel reactor with a Teflon inner container for two weeks is shown in Figure S8, which was recorded on a PANalytical Empyrean X-ray diffractometer operating at  $\lambda=1.54178\text{\AA}$  (Cu-K $\alpha$ ), 40kV, and 40mA. From Figure S8 it is clear that the observed pattern can well match with the reported XRD lines of gibbsite (lime) on PDF74-1775 and nordstrandite (fuchsia) on PDF72-623,<sup>116,117</sup> not only for their peak positions but also for their relative intensities, and no any residue line left, indicating that the product is a mixture of two types of  $\text{Al}(\text{OH})_3$ . After a Rietveld full-profile fitting based on their structures, a composition of 59% nordstrandite and 41% gibbsite is obtained with quite good *R* indexes and GOF value, implying that the phases quantitative analysis result is believable.

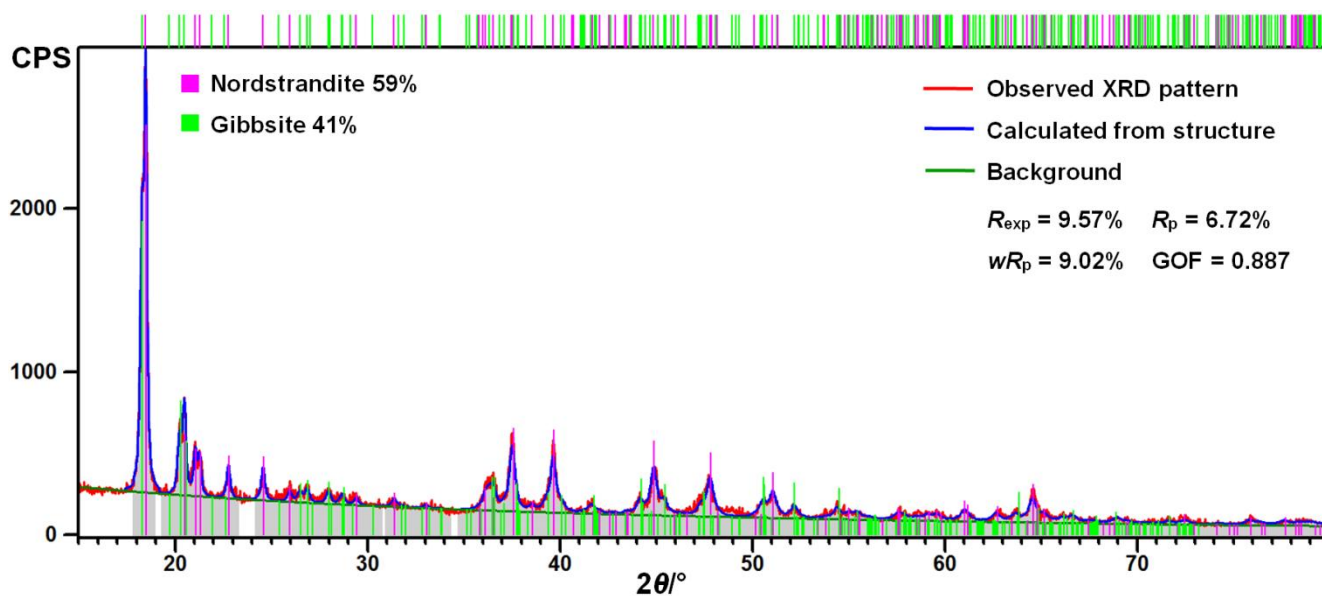

**Figure S8.** XRD pattern of the mixture precipitated from treated solution of  $\text{Al}_2(\text{OH})_4(\text{H}_2\text{O})_4\text{I}_2$  at  $75^\circ\text{C}$
